# Supplementary material for: Coordinated neuronal ensembles in primary auditory cortical columns
Source: eLife journal article supplement (doi:10.7554/elife.35587), 2018-06-05
Supplement: supp [file elife-35587-supp-v1.zip]

Archive with 14 entries (14 files):
- elife_poa_e35587_Figure_10_figure_supplement_1.pdf
- elife_poa_e35587_Figure_11_figure_supplement_4.pdf
- elife_poa_e35587_Figure_4_figure_supplement_1.pdf
- elife_poa_e35587_Transparent_Reporting_File.docx
- elife_poa_e35587_Figure_11_figure_supplement_3.pdf
- elife_poa_e35587_Figure_9_figure_supplement_2.pdf
- elife_poa_e35587_Figure_4_figure_supplement_3.pdf
- elife_poa_e35587_Supplementary_File_1.xlsx
- elife_poa_e35587_Figure_11_figure_supplement_1.pdf
- elife_poa_e35587_Figure_6_figure_supplement_1.pdf
- elife_poa_e35587_Figure_11_figure_supplement_2.pdf
- elife_poa_e35587_Figure_9_figure_supplement_1.pdf
- elife_poa_e35587_Figure_5_source_data_1.xlsx
- elife_poa_e35587_Figure_4_figure_supplement_2.pdf
