# Supplementary material for: Coordinated neuronal ensembles in primary auditory cortical columns
Source: eLife journal article supplement (doi:10.7554/elife.35587), 2018-06-05
Supplement: supp [file elife-35587-supp-v1.zip › elife_poa_e35587_Supplementary_File_1.xlsx]

## Sheet: Sheet1
Figure	Test	N	Comparisons (if multiple groups are present)	p-val
6J	Mann-Whitney U-test	73, 331	NA	1.69 x 10-23
6 - figure supplement 1 (ordered from left - right, top - bottom)		137, 630	NA	3.34 x 10-23
		123, 362		2.46 x 10-13
		244, 936		5.03 x 10-49
		162, 664		3.18 x 10-30
		10, 104		1.48 x 10-5
		283, 931		1.68 x 10-50
		60, 156		4.49 x 10-10
		180, 550		5.44 x 10-12
		63, 416		2.06 x 10-16
		170, 554		1.54 x 10-13
		365, 295		1.73 x 10-18
		269, 523		6.89 x 10-17
		266, 534		1.05 x 10-18
		50, 262		1.15 x 10-11
		212, 601		1.15 x 10-23
7A	F-test	16	NA	1.68 x 10-5
7B		16		0.02
9C, 9D	Wilcoxon signed-rank test	330	NA	1.84 x 10-26
9 - figure supplement 1D		96		2.03 x 10-8
9 - figure supplement 2B (ordered from left - right)		204, 261		5.24 x 10-14
		237, 583		2.75 x 10-49
		329, 337		3.26 x 10-43
9 - figure supplement 2C	Paired t-test	16	NA	1.73 x 10-5
10B	Wilcoxon signed-rank test	703	NA	1.62 x 10-37
10C				1.60 x 10-59
10 - figure supplement 1C		103		1.39 x 10-6
10 - figure supplement 1E				8.70 x 10-12
11A	Paired t-test	100	NA	6.15 x 10-38
11B		100		2.79 x 10-57
11C	Paired t-test with Bonferroni correction	16	Shuffled - Real	4.87 x 10-9
			PR - Real	4.62 x 10-8
			DG - Real	7.98 x 10-6
11D		16	Shuffled - Real	1.23 x 10-7
			PR - Real	0.04
			DG - Real	7.2 x 10-3
11E		400	Shuffled - Real	< 10-100
			PR - Real	< 10-100
			Repeat - Real	< 10-100
			DG - Real	< 10-100
11F		400	Shuffled - Real	< 10-100
			PR - Real	< 10-100
			Repeat - Real	< 10-100
			DG - Real	< 10-100
