# Supplementary material for: Coordinated neuronal ensembles in primary auditory cortical columns
Source: eLife journal article supplement (doi:10.7554/elife.35587), 2018-06-05
Supplement: supp [file elife_poa_e35587_Figure_5_source_data_1.xlsx]

## Sheet: Sheet1
Bin size (ms)	Brain area	Method/Analyses	Reference
5	CA1, DG, S1, V1	PCA/ICA, graph theory	(Almeida-Filho et al., 2014)
5 - 20	mAG, lAG	PCA/ICA	(Laubach et al., 2000)
10	A1, PAF	Pairwise cross-correlations	(Eggermont, 2006)
10	Retina	Maximum entropy models	(Granot-Atedgi et al., 2013)
10	CA1	PCA/ICA	(Lopes-dos-Santos et al., 2013)
10	Vg, PrV, VPM, S1, M1	PCA	(Nicolelis et al., 1995)
10 - 15	V1	Maximum entropy models	(Ohiorhenuan et al., 2010)
25	CA1	Population vectors, regression	(Harris et al., 2003)
50	V1	Logistic regression, population response	(Berens et al., 2012)
55	BF	Generalized linear models (GLM)	(Tingley et al., 2015)
100	S1	Dynamic bayesian networks	(Eldawlatly and Oweiss, 2011)
100	CA1	Correlation, population vectors	(Kudrimoti et al., 1999)
100	mPFC	PCA	(Peyrache et al., 2010)
100	M1, PP, PMd	Artificial neural networks	(Wessberg et al., 2000)
125 - 250	V1	Singular value decomposition (SVD)	(Carrillo-Reid et al., 2015)
125 - 250	V1	Monte Carlo	(Miller et al., 2014)
200	ACC	Populations state space, trajectories	(Balaguer-Ballester et al., 2011)
200	CA1	k-means clustering	(Malvache et al., 2016)
200 - 500	Corticostriatal slices	Population vectors	(Carrillo-Reid et al., 2011)
250	AC	Support vector machines (SVM), population response	(Bathellier et al., 2012)
400	LPFC	SVM decoding	(Tremblay et al., 2015)
650 - 1400	V1	Monte Carlo	(Ikegaya et al., 2004)
