# Supplementary figures and images for: Coordinated neuronal ensembles in primary auditory cortical columns
Source: eLife journal article supplement (doi:10.7554/elife.35587), 2018-06-05

**A**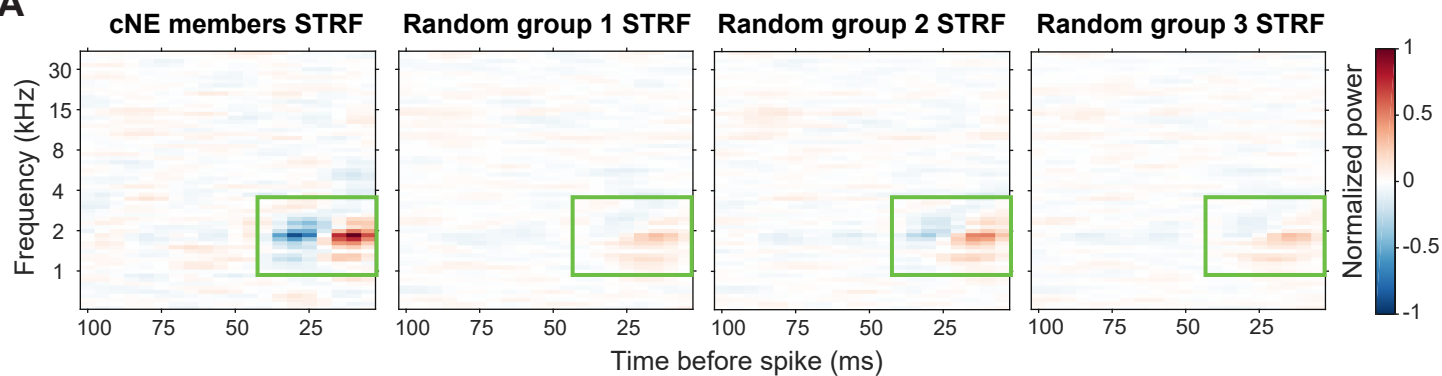**B**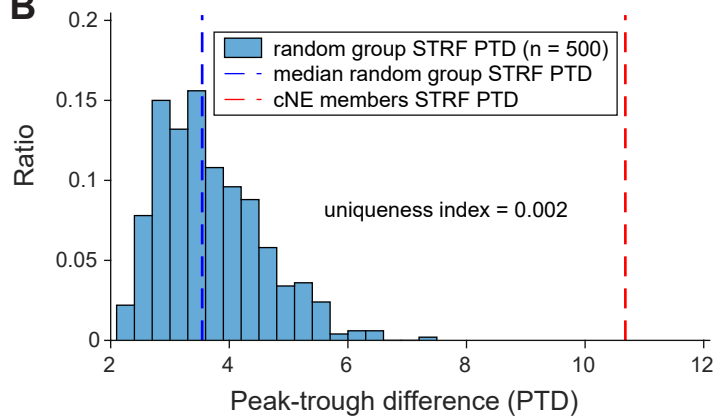**D**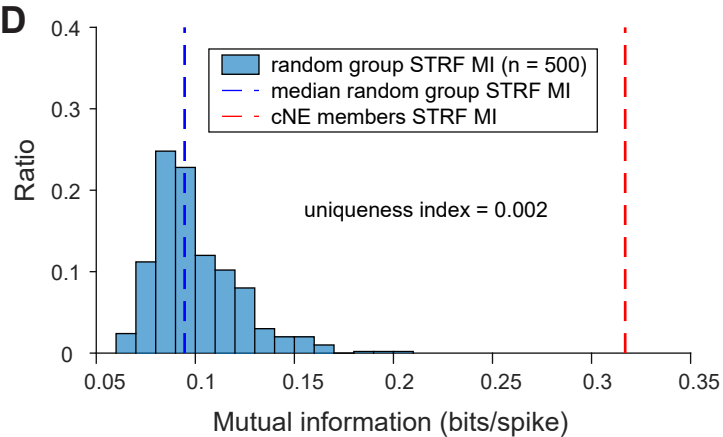**C**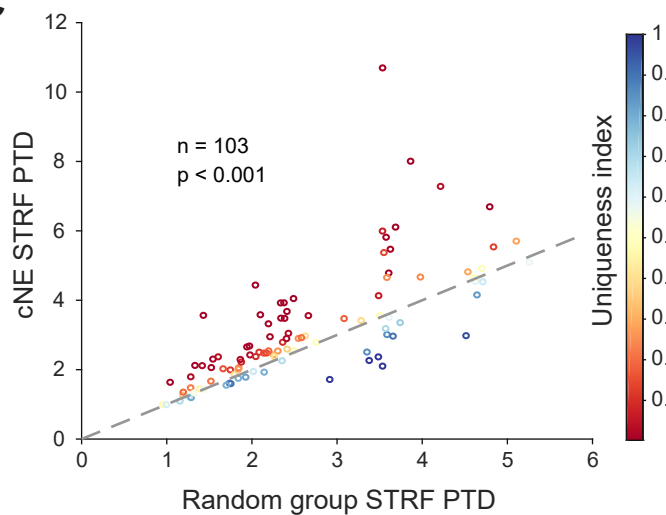**E**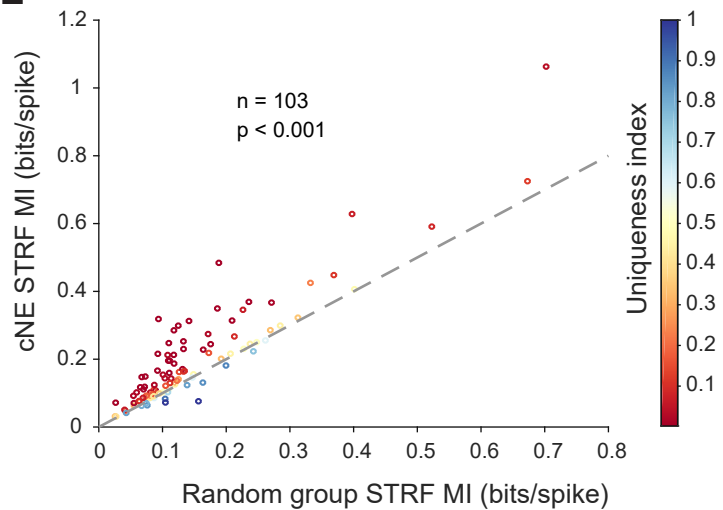

Supplement: supp [file elife-35587-supp-v1.zip › elife_poa_e35587_Figure_10_figure_supplement_1.pdf]

**A**

|           |   |   |   |   |   |   |   |   |   |   |          |
|-----------|---|---|---|---|---|---|---|---|---|---|----------|
| Neuron A: | 1 | 0 | 1 | 0 | 1 | 0 | 0 | 1 | 0 | 1 | Sum A: 5 |
| Neuron B: | 1 | 0 | 0 | 1 | 0 | 1 | 0 | 1 | 0 | 0 | Sum B: 4 |
| Neuron C: | 1 | 1 | 0 | 1 | 0 | 1 | 0 | 1 | 0 | 1 | Sum C: 6 |

$$\text{Coincidence ratio} = \frac{2}{4} = 0.5$$

**B**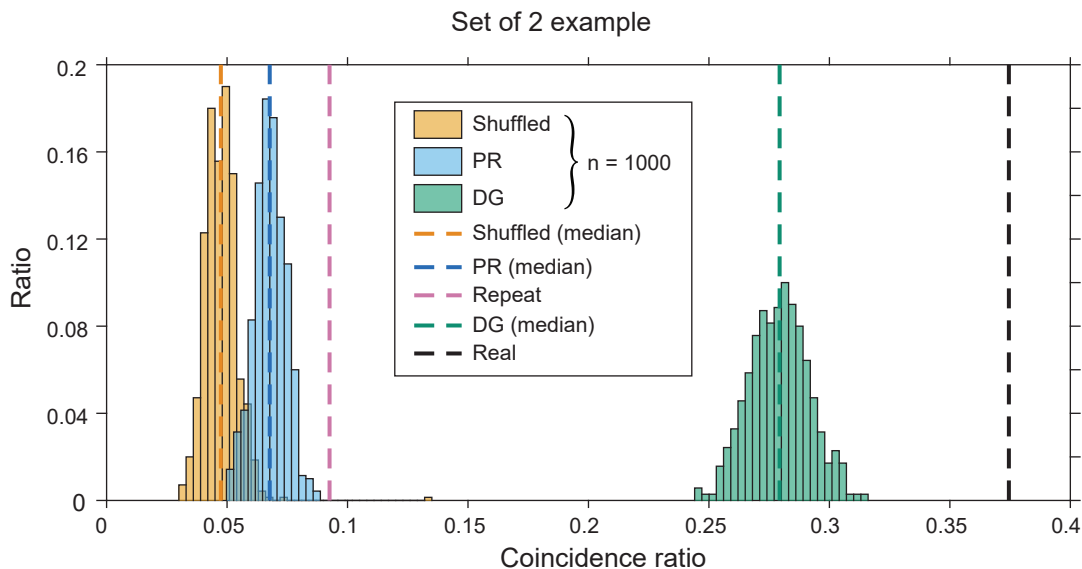

Supplement: supp [file elife-35587-supp-v1.zip › elife_poa_e35587_Figure_11_figure_supplement_4.pdf]

Neuron #

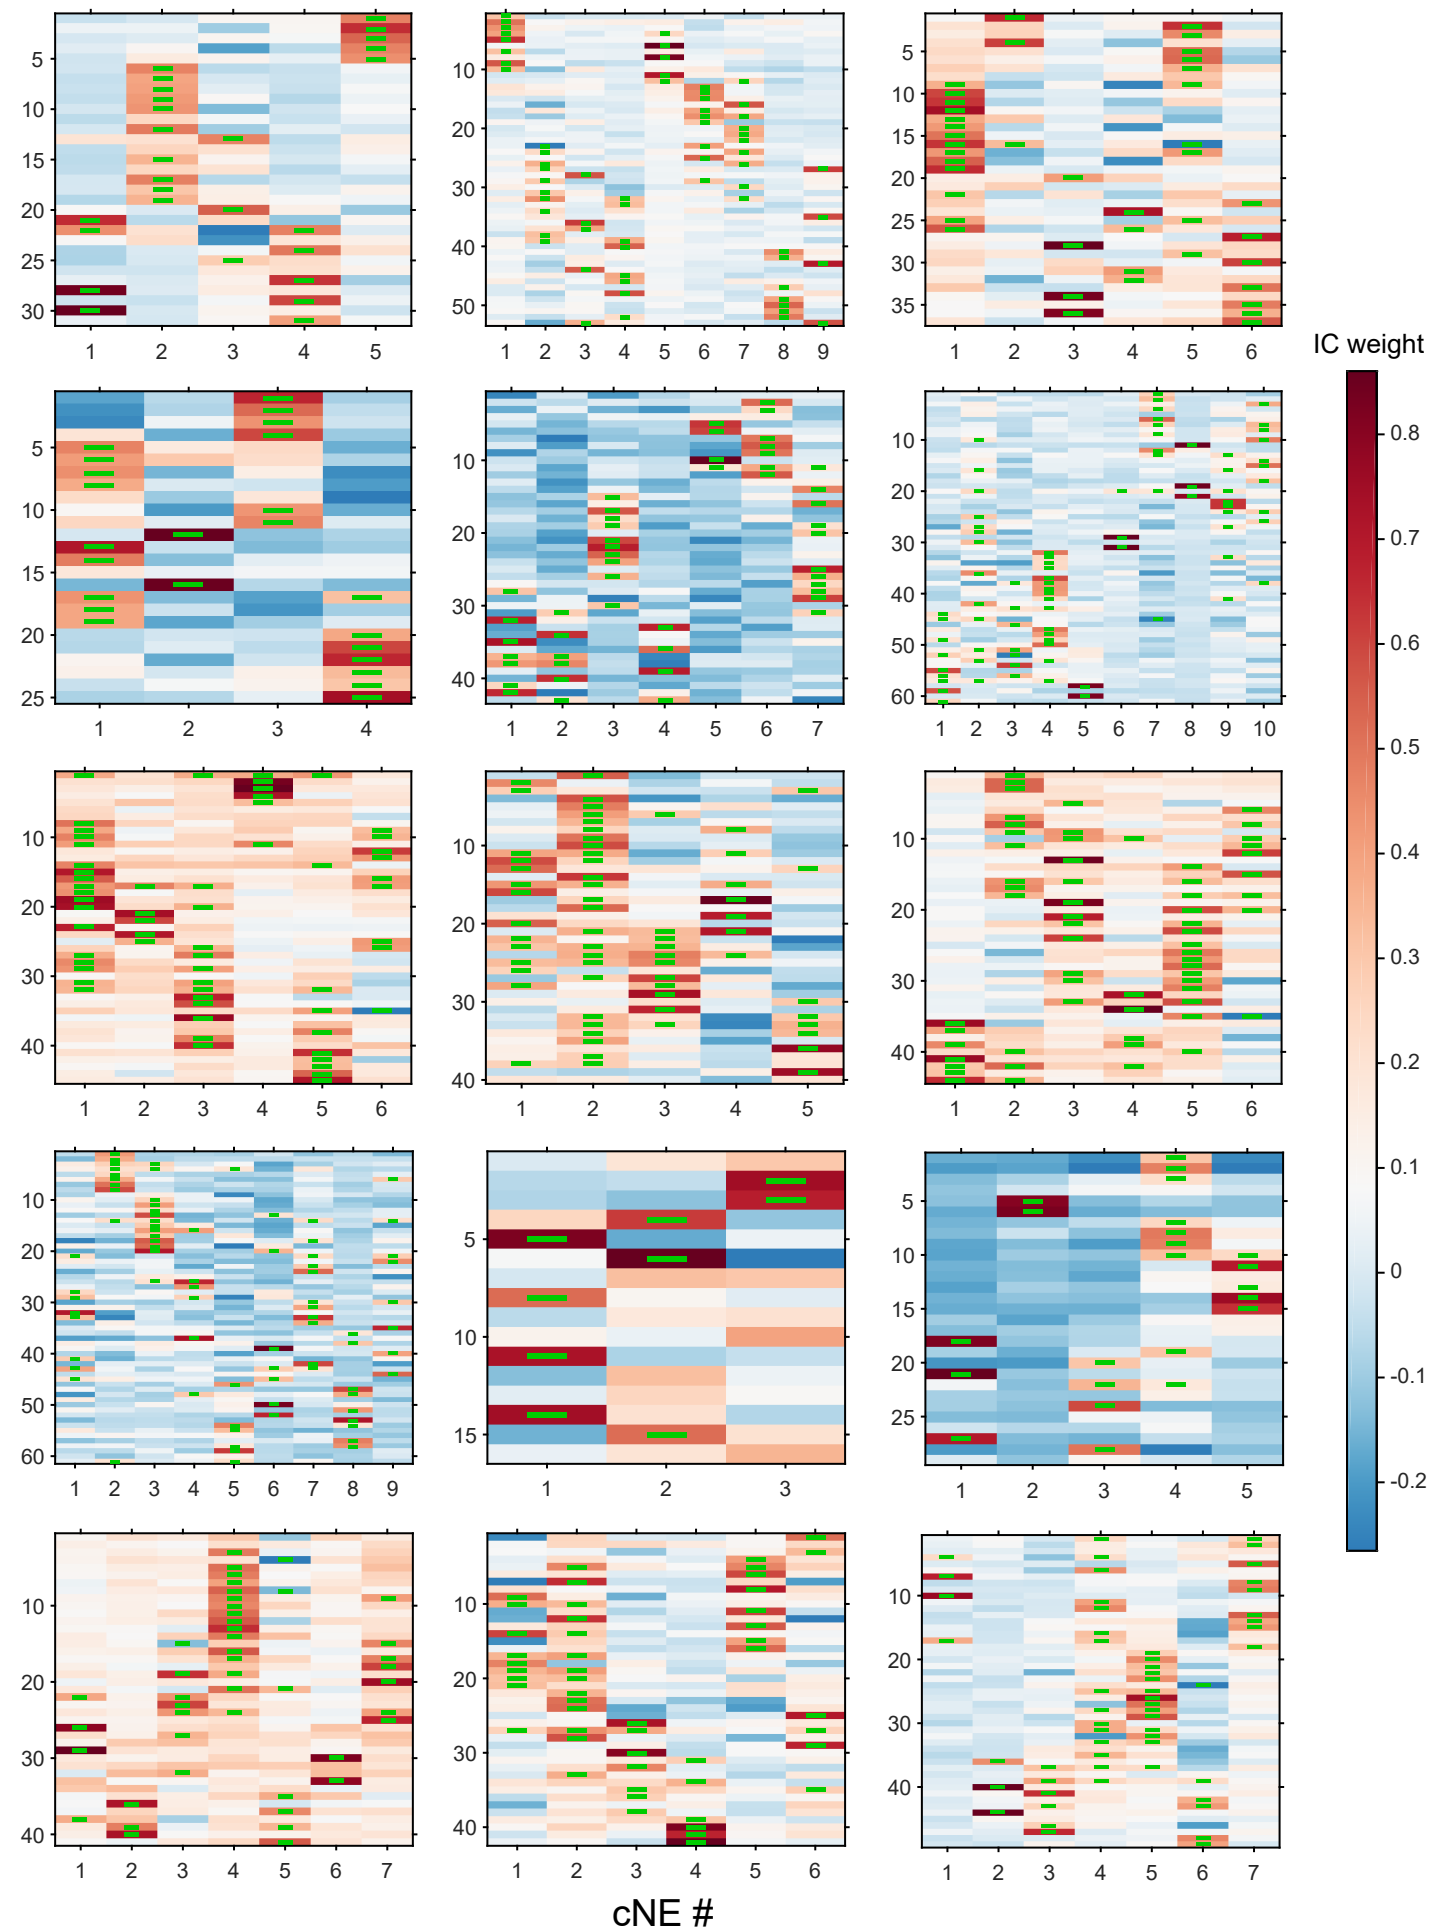

Supplement: supp [file elife-35587-supp-v1.zip › elife_poa_e35587_Figure_4_figure_supplement_1.pdf]

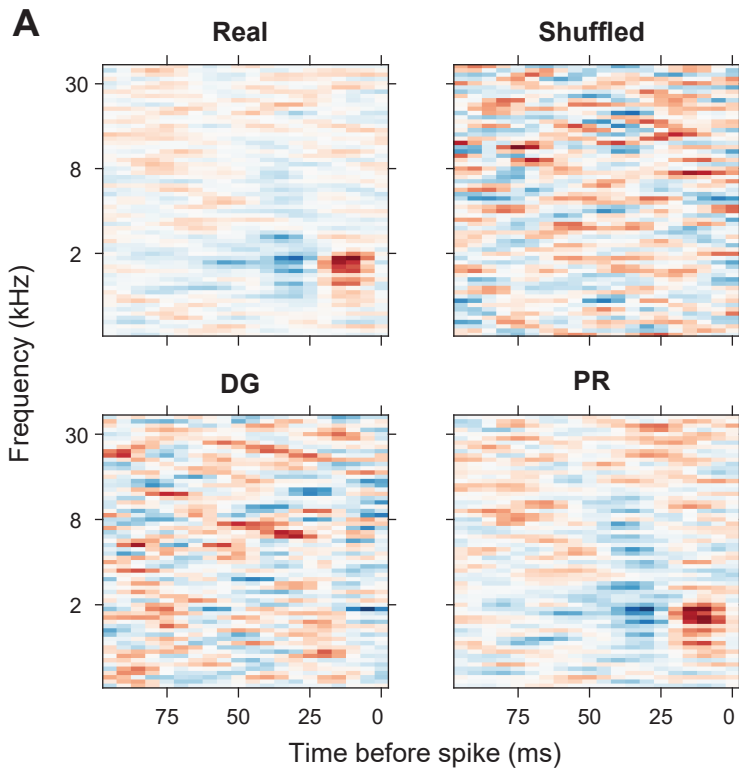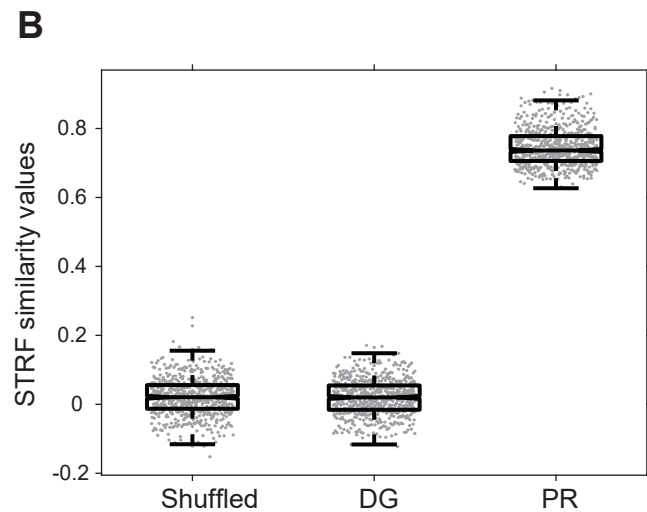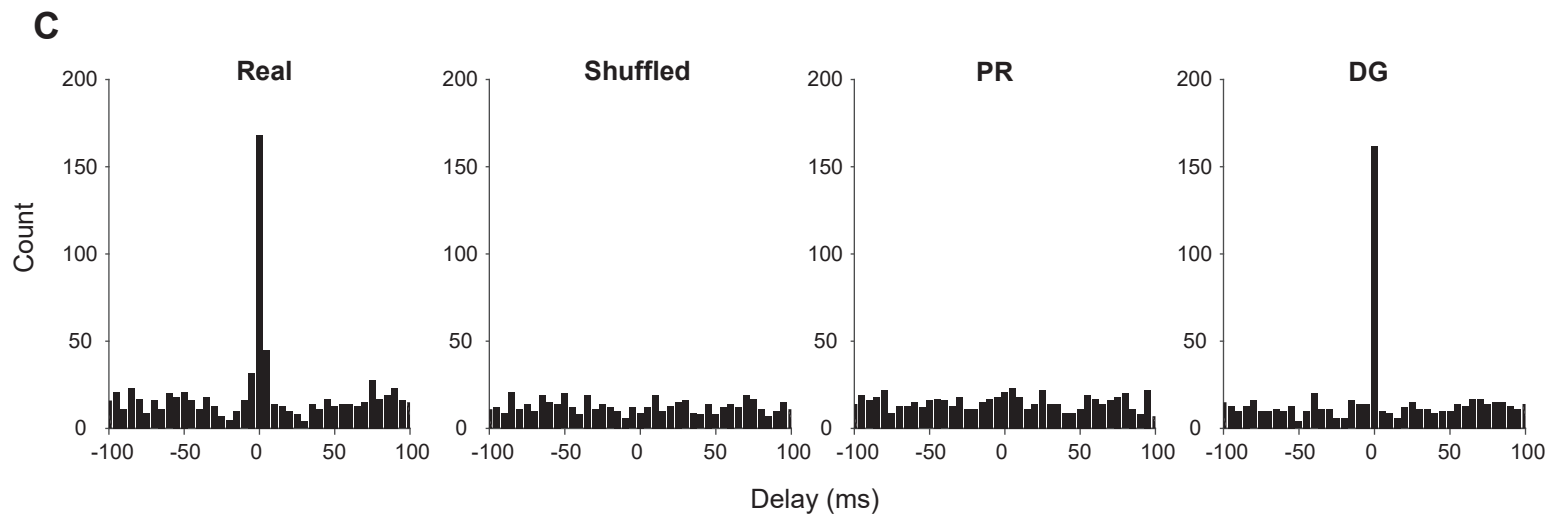

Supplement: supp [file elife-35587-supp-v1.zip › elife_poa_e35587_Figure_11_figure_supplement_3.pdf]

**A**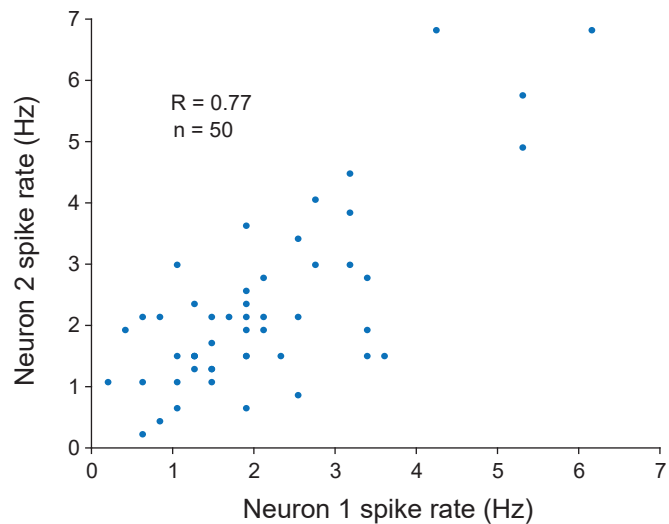**C**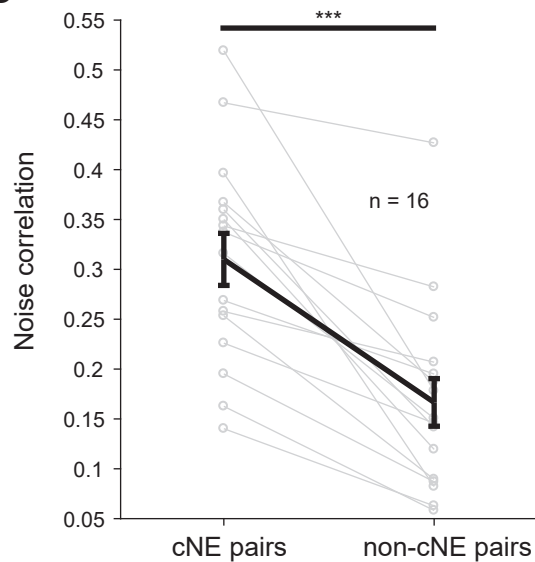**B**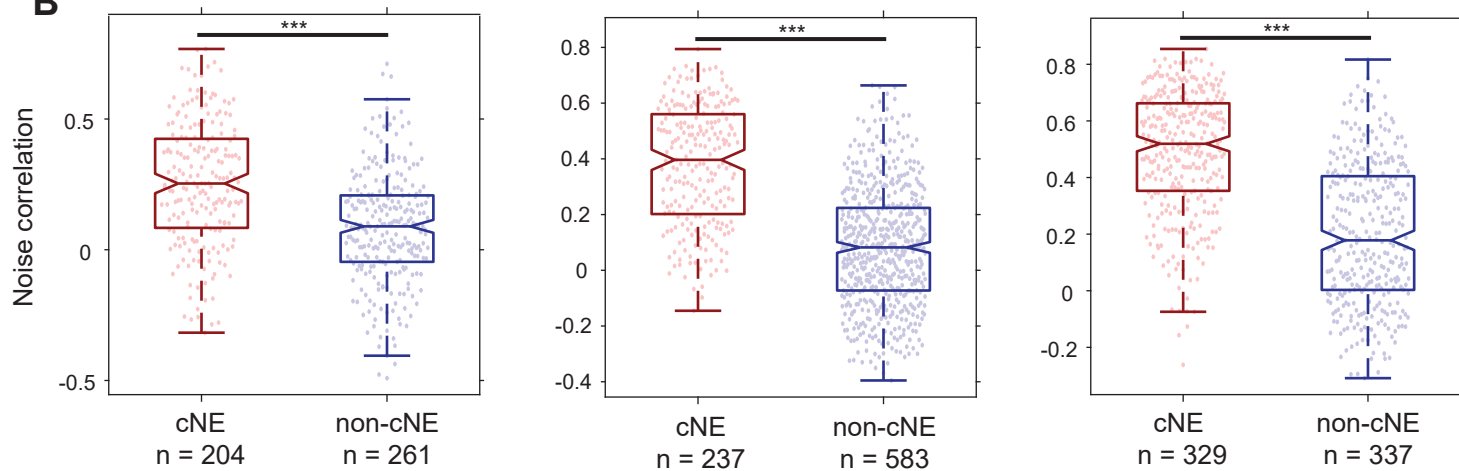

Supplement: supp [file elife-35587-supp-v1.zip › elife_poa_e35587_Figure_9_figure_supplement_2.pdf]

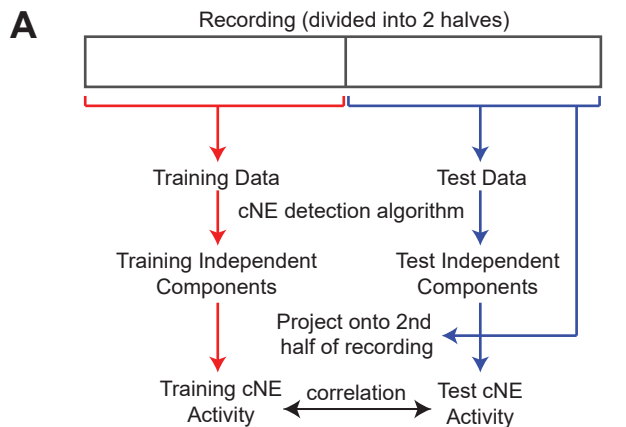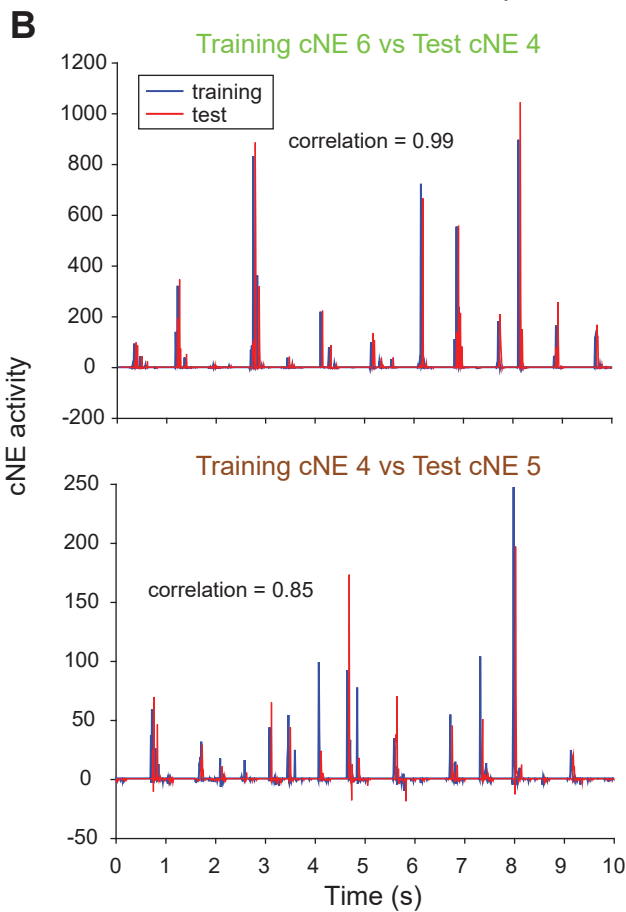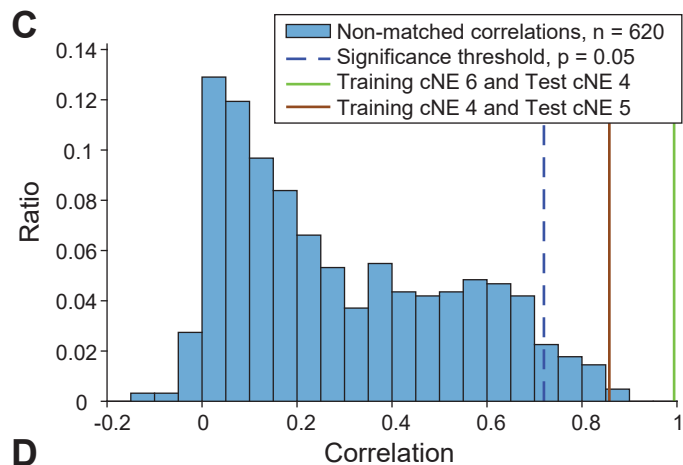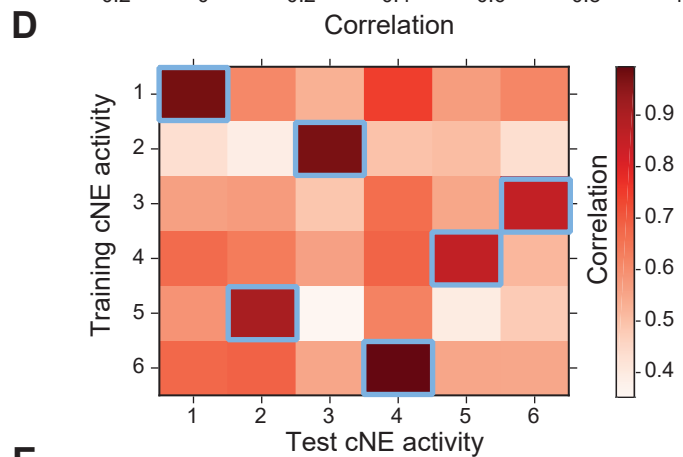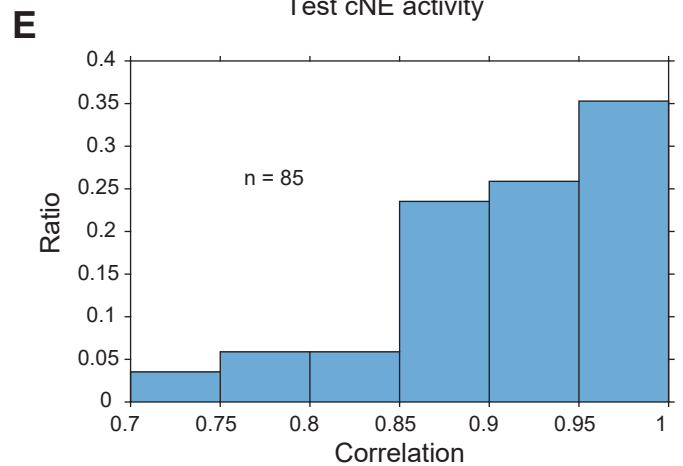

Supplement: supp [file elife-35587-supp-v1.zip › elife_poa_e35587_Figure_4_figure_supplement_3.pdf]

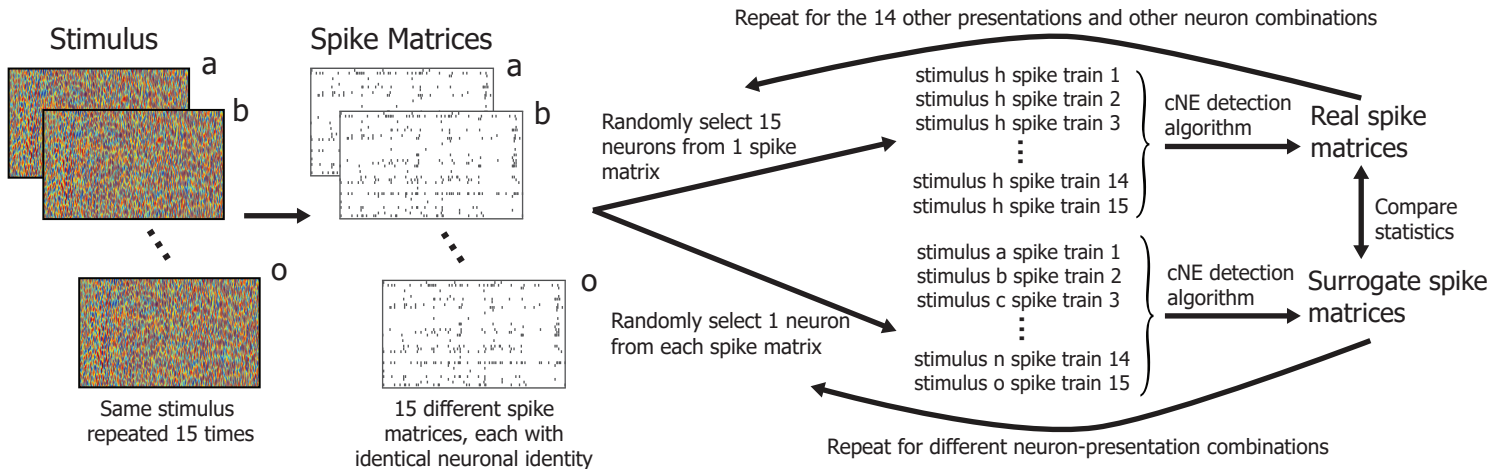

Supplement: supp [file elife-35587-supp-v1.zip › elife_poa_e35587_Figure_11_figure_supplement_1.pdf]

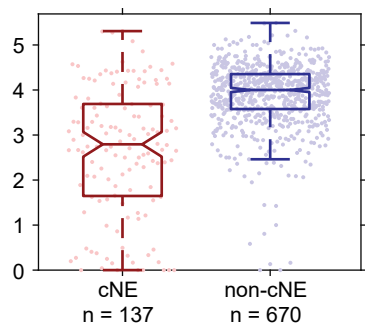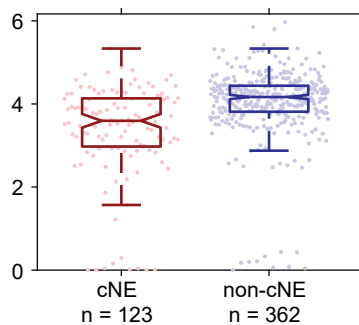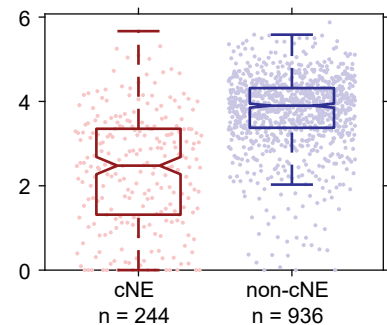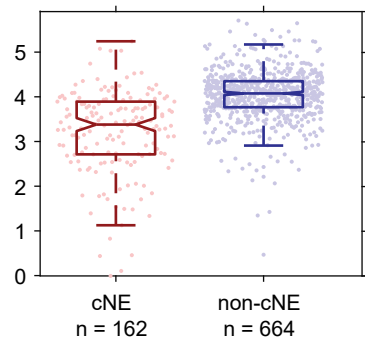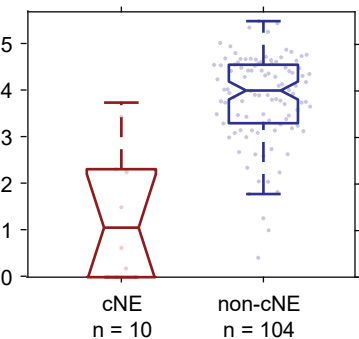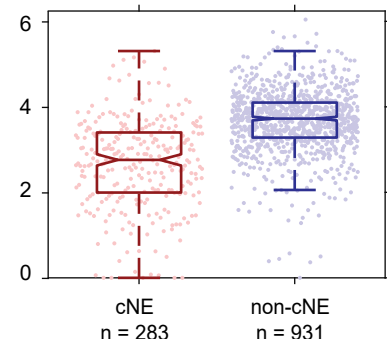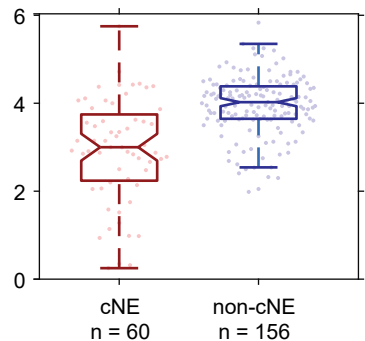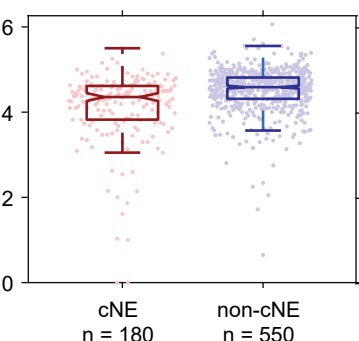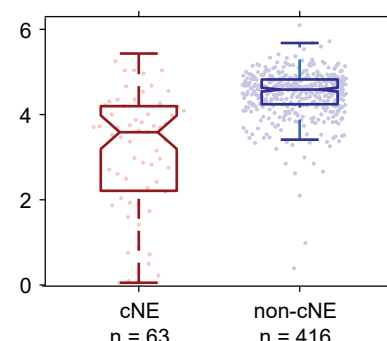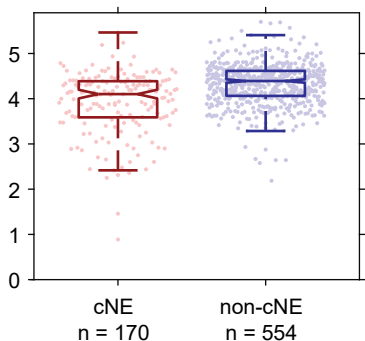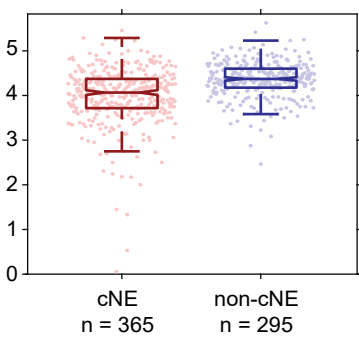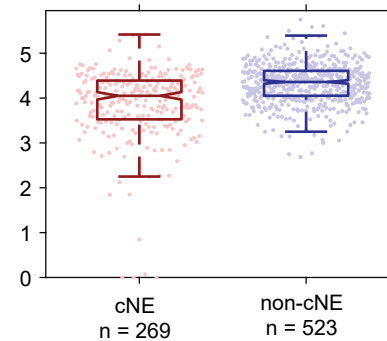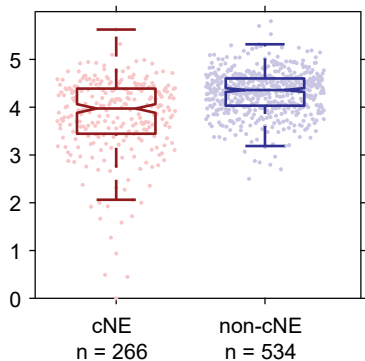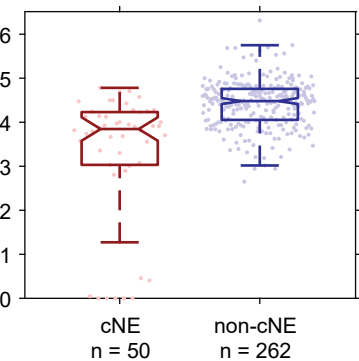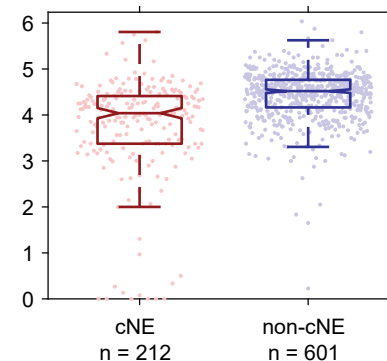

Supplement: supp [file elife-35587-supp-v1.zip › elife_poa_e35587_Figure_6_figure_supplement_1.pdf]

**A**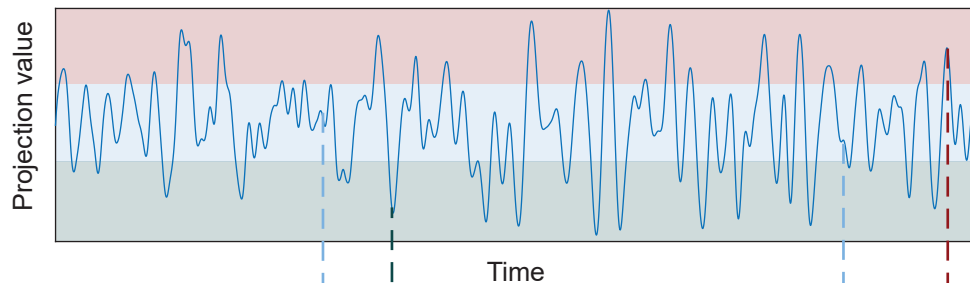

Real spike train:

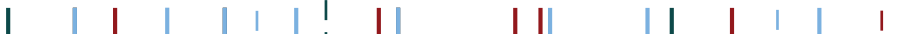

PR model:

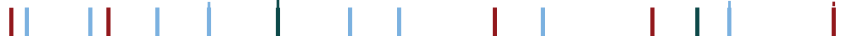

Each spike  
train has:  
Red spikes: 5  
Blue spikes: 8  
Green spikes: 2

**B**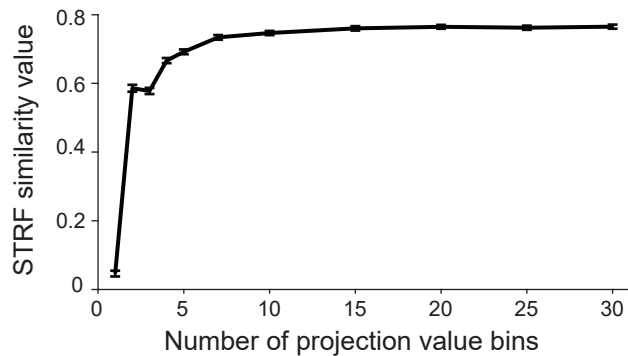

Supplement: supp [file elife-35587-supp-v1.zip › elife_poa_e35587_Figure_11_figure_supplement_2.pdf]

**A****Random group spike raster**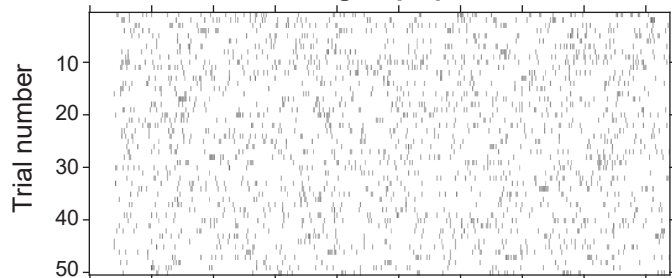**B****cNE spike raster**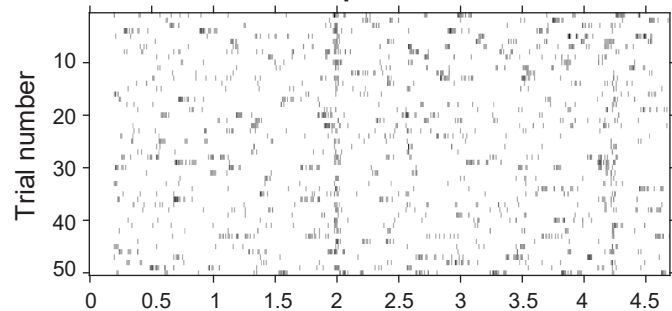Spike  
count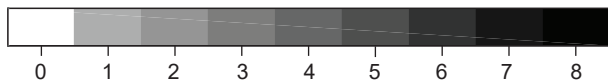**C**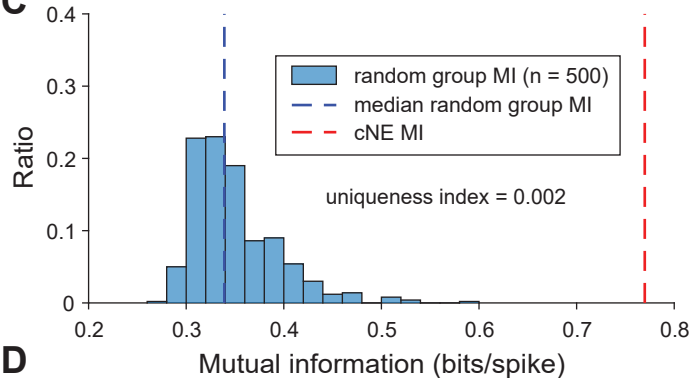**D**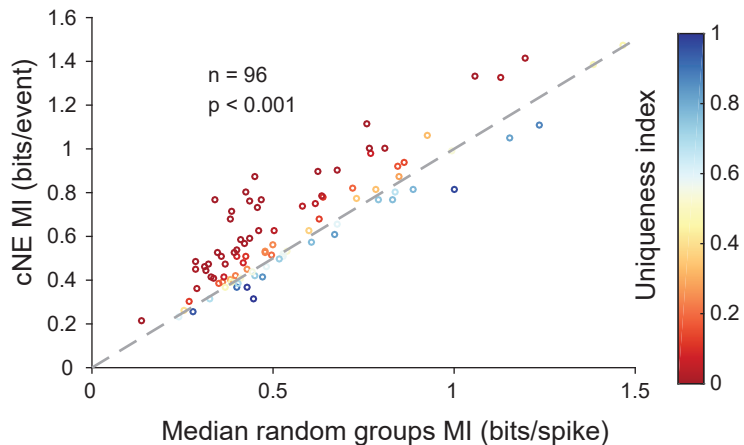

Supplement: supp [file elife-35587-supp-v1.zip › elife_poa_e35587_Figure_9_figure_supplement_1.pdf]

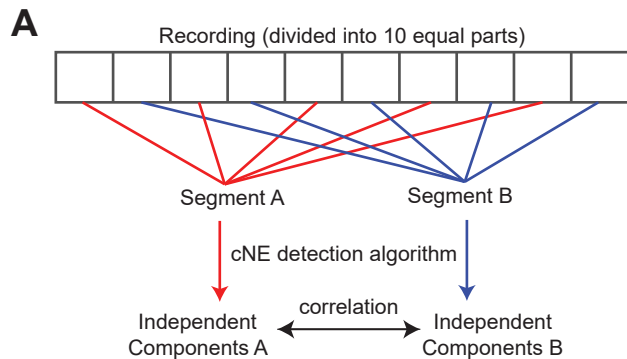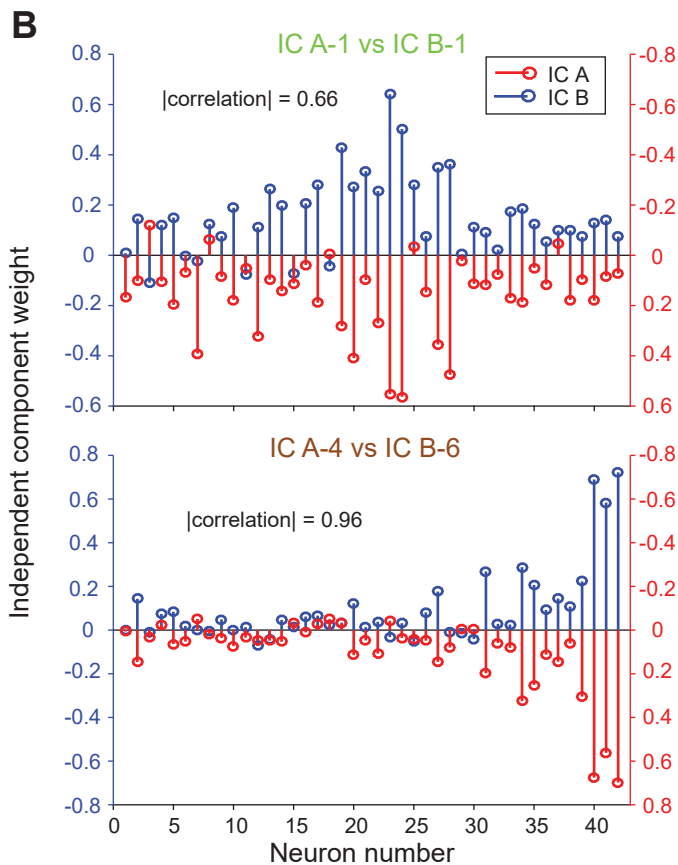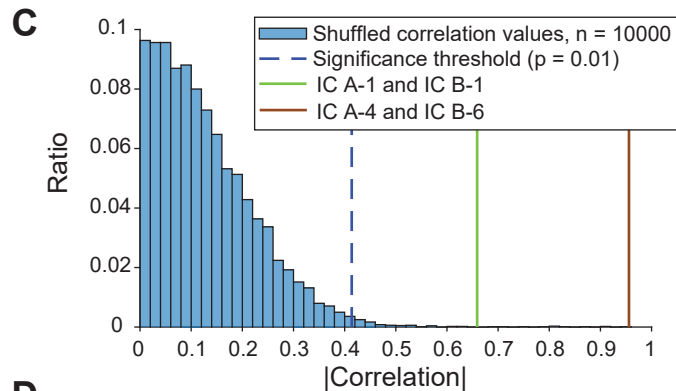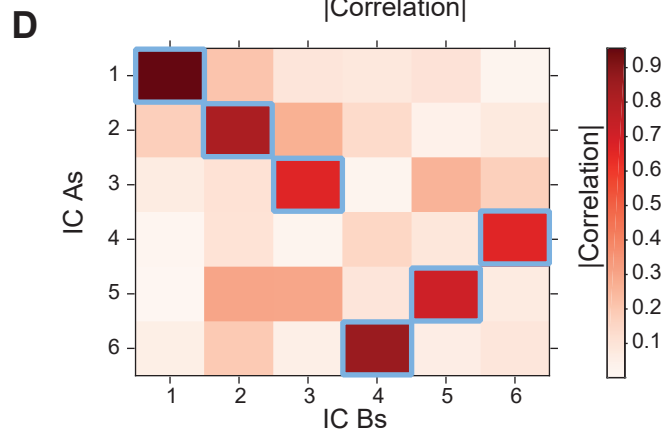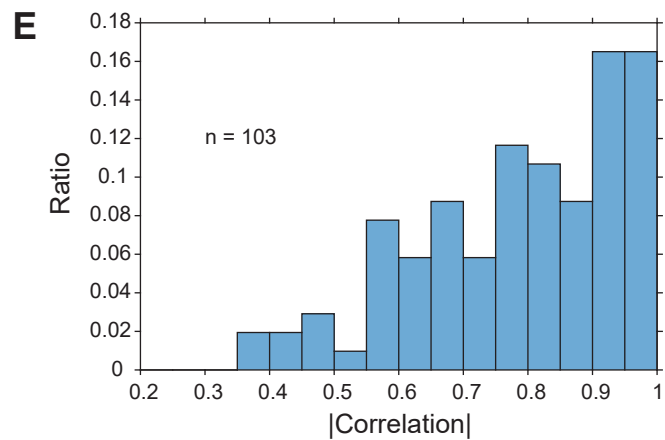

Supplement: supp [file elife-35587-supp-v1.zip › elife_poa_e35587_Figure_4_figure_supplement_2.pdf]
